# Supplementary material for: A mild reduction of Co-doped MnO2 to create abundant oxygen vacancies and active sites for enhanced oxygen evolution reaction
Source: Royal Society of Chemistry journal article supplement (doi:10.1039/d1nr02324a), 2021-01-01
Supplement: d1nr02324a1.pdf [file d1nr02324a1.pdf]

## Supporting Information

### A mild reduction of Co-doped $\text{MnO}_2$ to create abundant oxygen vacancies and active sites for enhanced oxygen evolution reaction

Jincan Jia,<sup>a</sup> Lei Li,<sup>b</sup> Xiao Lian,<sup>a</sup> Mingzai Wu,<sup>c</sup> Fangcai Zheng,<sup>d</sup> Li Song,<sup>\*b</sup> Guangzhi Hu<sup>b</sup>  
and Helin Niu<sup>\*a</sup>

<sup>a</sup> Anhui Province Key Laboratory of Chemistry for Inorganic/Organic Hybrid Functionalized Materials, Key Laboratory of Functional Inorganic Materials of Anhui Province, Department of Chemistry, Anhui University, Hefei 230601, PR China

<sup>b</sup> College of Biological, Chemical Sciences and Engineering, Jiaying University, Jiaying, Zhejiang 314001, PR China

<sup>c</sup> Energy Materials and Devices Key Lab of Anhui Province for Photoelectric Conversion, School of Physics and Materials Science, Anhui University, Hefei 230039, China.

<sup>d</sup> Key Laboratory of Structure and Functional Regulation of Hybrid Materials of Ministry of Education, Institutes of Physical Science and Information Technology, Anhui University, Hefei 230601, China.

\*Corresponding author. Email: niuhelin@ahu.edu.cn; songli@mail.zjxu.edu.cn.

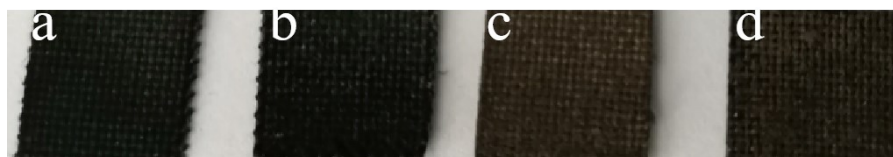

Figure S1. Photographs of (a)  $\text{MnO}_2$ , (b)  $\text{MnO}_2@\text{Mn}_3\text{O}_4$ , (c) Co-doped- $\text{MnO}_2$ , (d) Co-doped- $\text{MnO}_2@\text{MnCo}_2\text{O}_{4.5}$ .

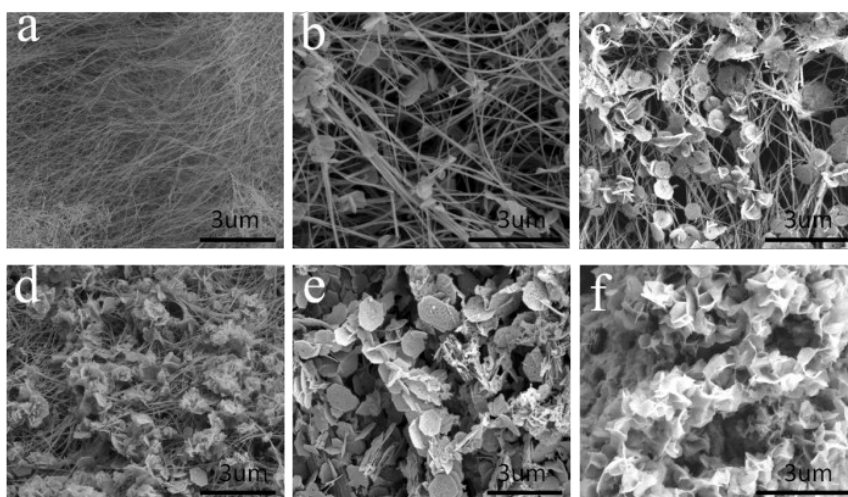

Figure S2. SEM images of Co-doped  $\text{MnO}_2@ \text{MnCo}_2\text{O}_{4.5}$  samples at different time (a) 0h, (b) 8h, (c) 12h, (d) 16h, (e) 20h, (f) 24h.

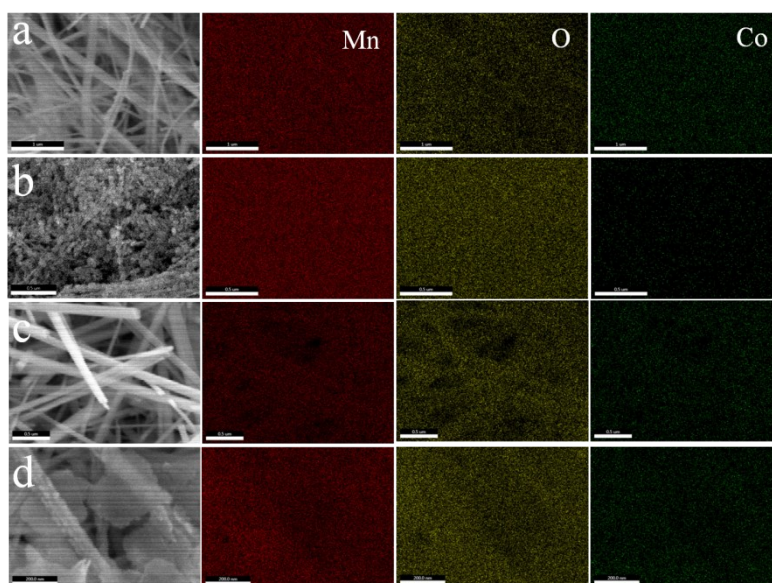

Figure S3. SEM element mapping of (a)  $\text{MnO}_2$ , (b)  $\text{MnO}_2@ \text{Mn}_3\text{O}_4$ , (c) Co-doped- $\text{MnO}_2$ , (d) Co-doped- $\text{MnO}_2@ \text{MnCo}_2\text{O}_{4.5}$ : SEM images showing the area of mapping and element mappings for Mn, O and Co elements.

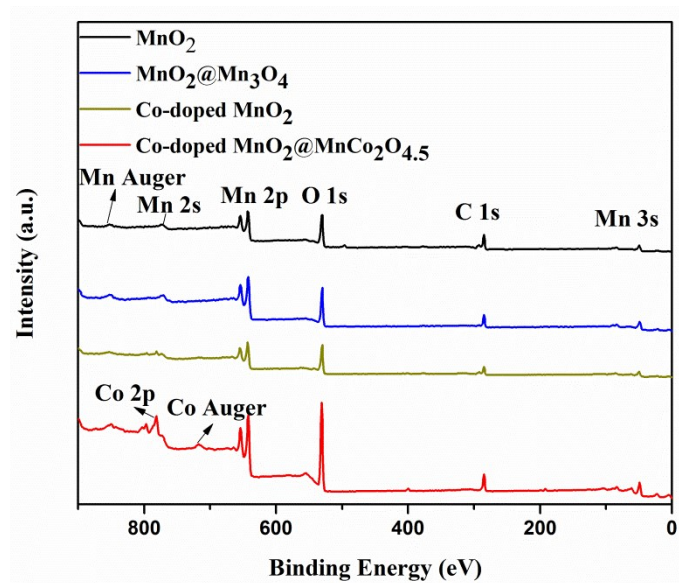

Figure S4. XPS survey spectrum of  $\text{MnO}_2$ ,  $\text{MnO}_2@\text{Mn}_3\text{O}_4$ , Co-doped- $\text{MnO}_2$ , Co-doped  $\text{MnO}_2@\text{MnCo}_2\text{O}_{4.5}$ .

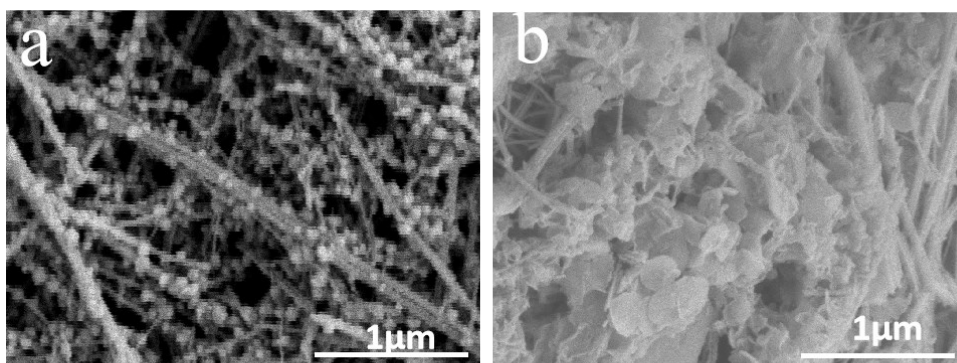

Figure S5. SEM images of the samples after durability test (a)  $\text{MnO}_2@\text{Mn}_3\text{O}_4$ , (b) Co-doped  $\text{MnO}_2@\text{MnCo}_2\text{O}_{4.5}$ .

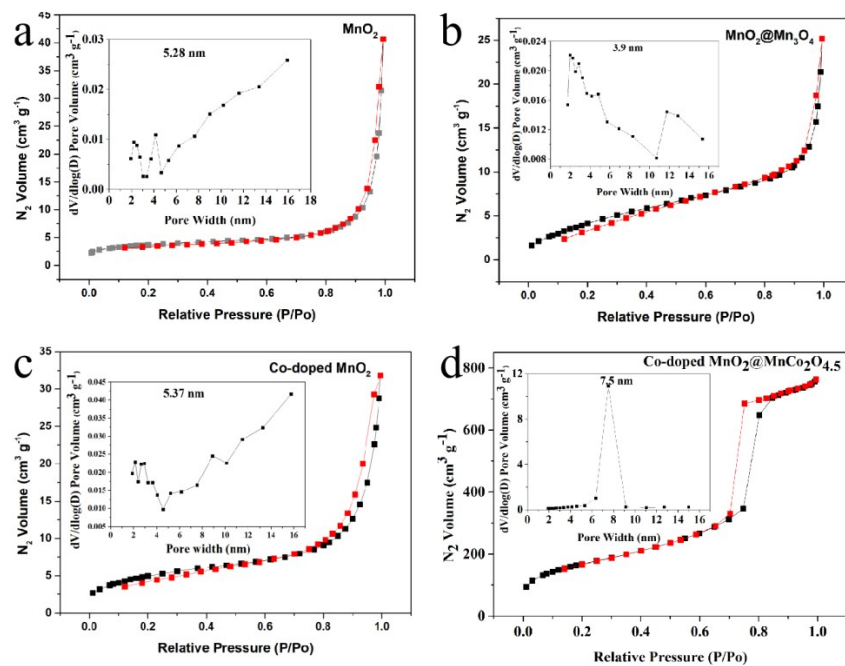

Figure S6.  $N_2$  adsorption/desorption isotherm and the corresponding pore size distribution (inset image) of (a)  $MnO_2$ , (b)  $MnO_2@Mn_3O_4$ , (c) Co-doped- $MnO_2$ , (d)

Co-doped- $MnO_2@MnCo_2O_{4.5}$ .

Table S1. The BET information of MnO<sub>2</sub>, (b) MnO<sub>2</sub>@Mn<sub>3</sub>O<sub>4</sub>, (c) Co-doped-MnO<sub>2</sub>, (d)

Co-doped-MnO<sub>2</sub>@MnCo<sub>2</sub>O<sub>4.5</sub>

| Samples                                                       | Pore size (nm) | V (cm <sup>3</sup> g <sup>-1</sup> ) | S <sub>BET</sub> (m <sup>2</sup> g <sup>-1</sup> ) |
|---------------------------------------------------------------|----------------|--------------------------------------|----------------------------------------------------|
| MnO <sub>2</sub>                                              | 5.28           | 0.011                                | 12                                                 |
| MnO <sub>2</sub> @Mn <sub>3</sub> O <sub>4</sub>              | 3.9            | 0.03                                 | 15                                                 |
| Co-doped MnO <sub>2</sub>                                     | 5.37           | 0.049                                | 17.70                                              |
| Co-doped MnO <sub>2</sub> @MnCo <sub>2</sub> O <sub>4.5</sub> | 7.5            | 1.17                                 | 574                                                |

Table S2. The Mn:Co atom ratio of the Co-doped-MnO<sub>2</sub> and Co-doped-MnO<sub>2</sub>@MnCo<sub>2</sub>O<sub>4.5</sub> from ICP-AES analysis.

| Samples                                                       | Mn (at. %) | Co (at. %) | The Mn:Co atom ratio |
|---------------------------------------------------------------|------------|------------|----------------------|
| Co-doped MnO <sub>2</sub>                                     | 29.8       | 5.5        | 5.4:1                |
| Co-doped MnO <sub>2</sub> @MnCo <sub>2</sub> O <sub>4.5</sub> | 31.1       | 3.5        | 8.9:1                |
